# Supplementary material for: ZNF674-AS1 antagonizes miR-423-3p to induce G0/G1 cell cycle arrest in non-small cell lung cancer cells
Source: PubMed Central journal article supplement (PMC7901084; doi:10.1186/s11658-021-00247-y), 2021-02-22
Supplement: 11658_2021_247_MOESM1_ESM.pdf [file 11658_2021_247_MOESM1_ESM.pdf]

**Additional Table S1 Clinicopathological features of NSCLC patients (n = 83)**

---

| <b>Variable</b>         | <b>n</b> |
|-------------------------|----------|
| <hr/>                   |          |
| Age                     |          |
| <65                     | 38       |
| ≥65                     | 45       |
| Sex                     |          |
| Male                    | 55       |
| Female                  | 28       |
| TNM stage               |          |
| I-II                    | 50       |
| III-IV                  | 33       |
| Histological subtype    |          |
| Squamous cell carcinoma | 22       |
| Adenocarcinoma          | 61       |
| Lymph node metastasis   |          |
| Negative                | 47       |
| Positive                | 36       |

---

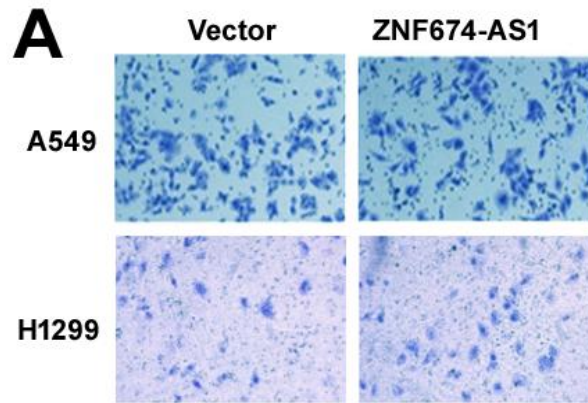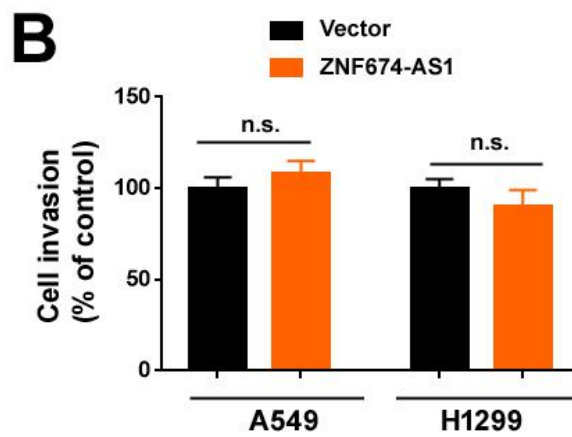

Additional Figure S1. Effect of ZNF674-AS1 overexpression on the invasion of NSCLC cells. (A) Representative images of Transwell invasion assay. (B) Quantification results of Transwell invasion assay. ns: no significance.

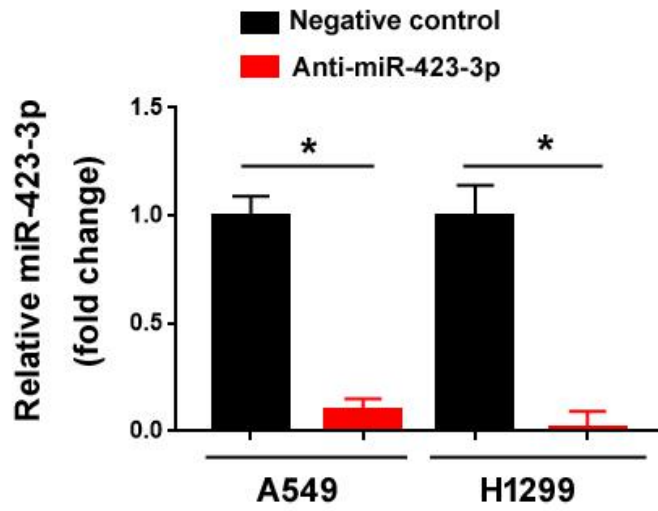

Additional Figure S2. Quantification of miR-423-3p expression in A549 and H1299 cells transfected with negative control or anti-miR-423-3p by real-time PCR analysis.

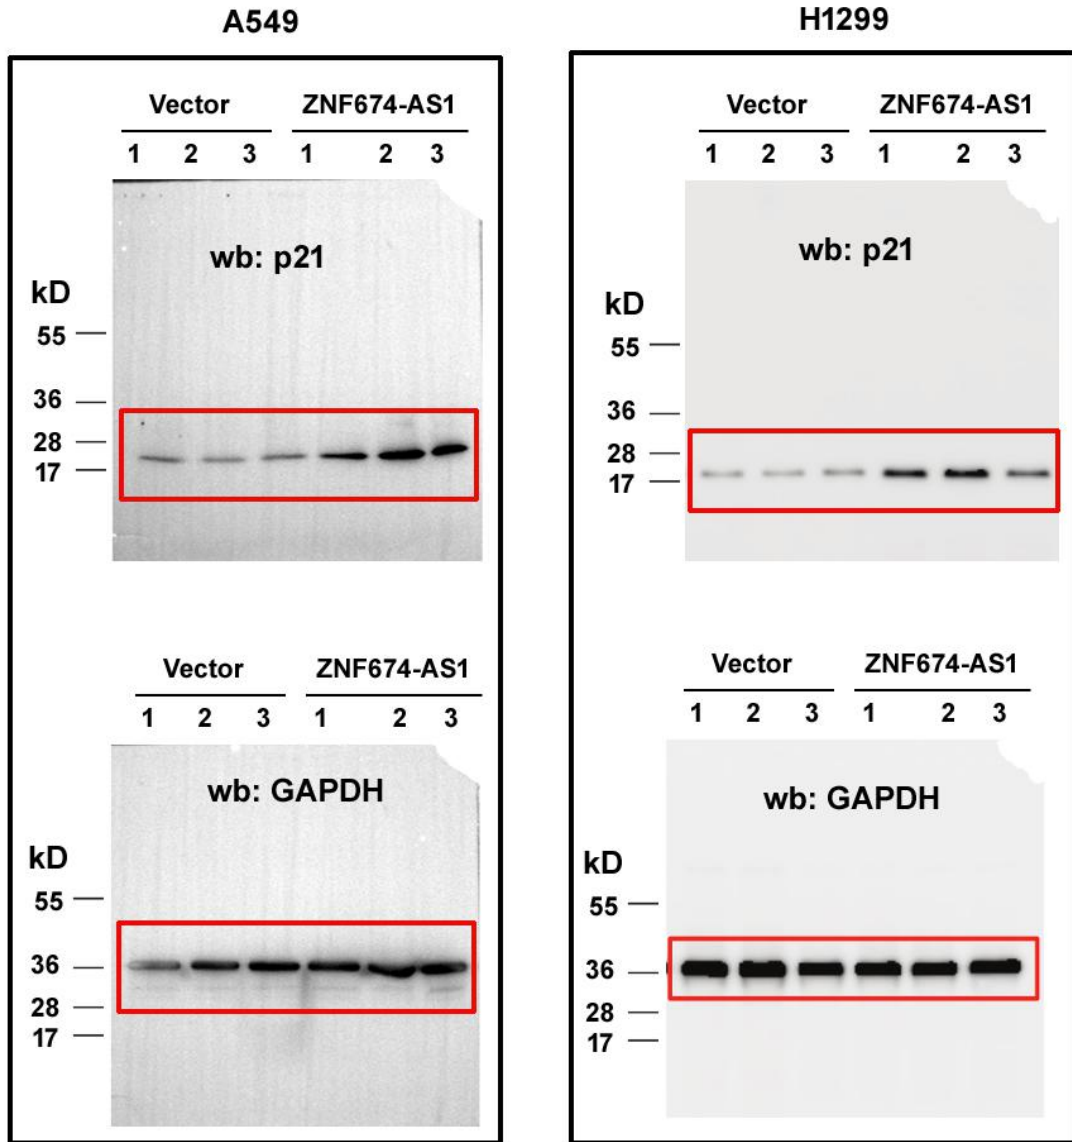

1-3: replicates 1-3, respectively.

Original Western blot images for Figure 5B.

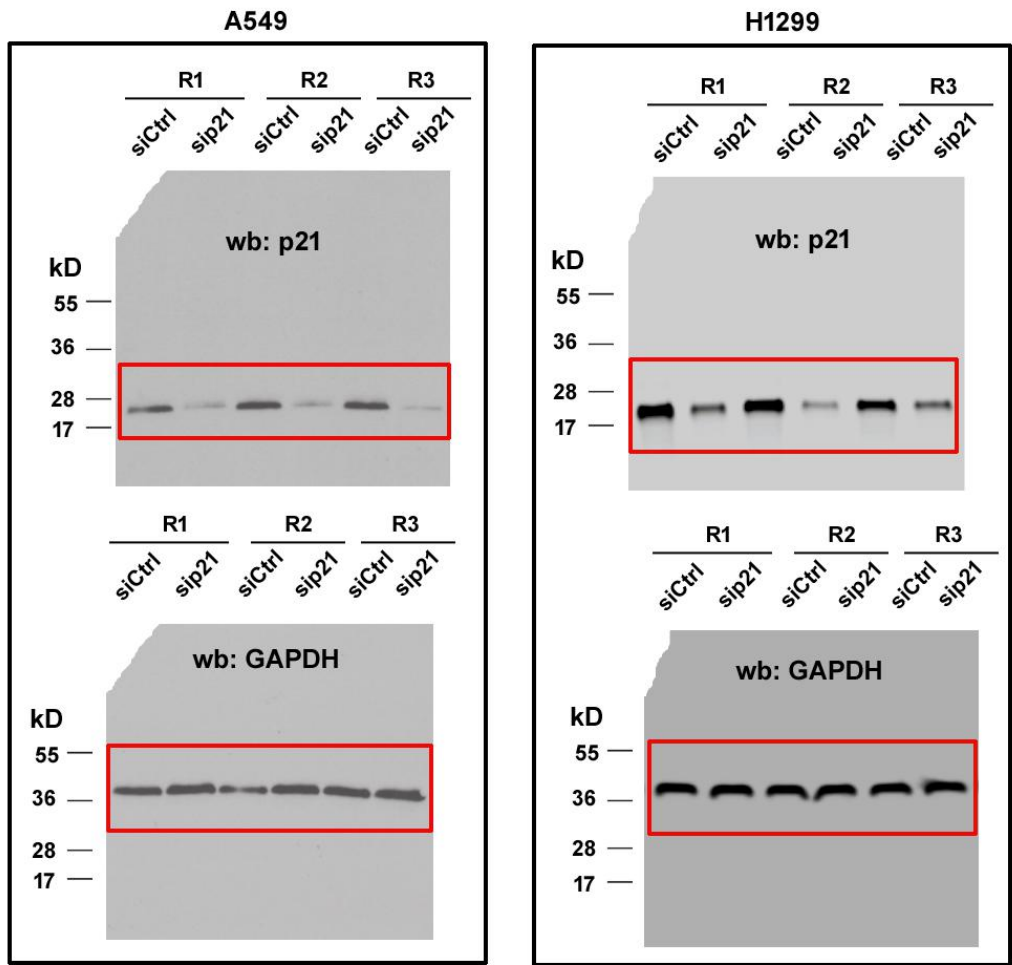

R1, R2, and R3: replicate 1, replicate 2, and replicate 3, respectively.

Original Western blot images for Figure 5D.

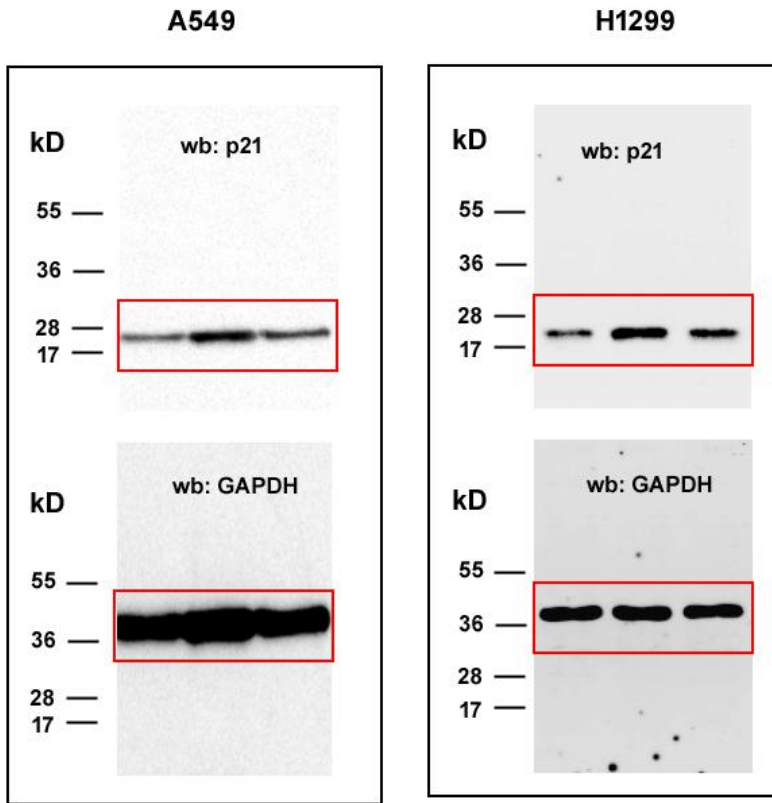

Original Western blot images for Figure 6C.
